# Supplementary material for: Chalcone Derivatives as Potential Inhibitors of P-Glycoprotein and NorA: An In Silico and In Vitro Study
Source: Biomed Res Int. 2022 Mar 26;2022:9982453. doi: 10.1155/2022/9982453 (PMC8976639; doi:10.1155/2022/9982453)
Supplement: Supplementary Materials — Supplementary material is provided as a PDF file containing the following information: Figure S1: 2D structures of 27 chalcone derivatives predicted as potential P-gp inhibitors by our 2D QSAR model. Figure S2: IR spectra of the four selected chalcones F29, F88, F90, and F91. Supporting information is available free of charge. [file 9982453.f1.docx]

**Supplementary Material**

**Chalcone derivatives as potential inhibitors of P-glycoprotein and NorA: an *in silico* and *in vitro* study**

Minh-Tri Le,1,2,#Dieu-Thuong Thi Trinh3,4,#, Trieu-Du Ngo,1 Viet-Khoa Tran-Nguyen,1 Dac-Nhan Nguyen,1 Tung Hoang,1 Hoang-Minh Nguyen,1 Tran-Giang-Son Do,1 Thanh-Tan Mai,1 Thanh-Dao Tran,1,* and Khac-Minh Thai1,*

1Department of Medicinal Chemistry, Faculty of Pharmacy, University of Medicine and Pharmacy at Ho Chi Minh City, 41 Dinh Tien Hoang, Dist 1, Ho Chi Minh City 700000, Vietnam

2School of Medicine, Vietnam National University Ho Chi Minh City, Linh Trung Ward, Thu Duc District, Ho Chi Minh City, 700000 Vietnam

3Faculty of Traditional Medicine, University of Medicine and Pharmacy at Ho Chi Minh City, 700000, Vietnam

4University Medical Center Ho Chi Minh City, University of Medicine and Pharmacy at Ho Chi Minh City, 700000, Vietnam.

# These authors contributed equally to this work and are co-first authors.

Correspondence should be addressed to Thanh-Dao Tran (daott@ump.edu.vn) and Khac-Minh Thai (thaikhacminh@ump.edu.vn; thaikhacminh@gmail.com)

|  |  |  |
| --- | --- | --- |
| F4 | F5 | F6 |
|  |  |  |
| F7 | F11 | F14 |
|  |  |  |
| F16 | F17 | F18 |
|  |  |  |
| F29 | F30 | F32 |
|  |  |  |
| F33 | F34 | F35 |
|  |  |  |
| F36 | F37 | F44 |
|  |  |  |
| F45 | F61 | F63 |
|  |  |  |
| F65 | F88 | F89 |
|  |  |  |
| F90 | F91 | F95 |

**Figure S1.** 2D structures of 27 chalcone derivatives predicted as potential P-gp inhibitors by our 2D QSAR model.

**F29**


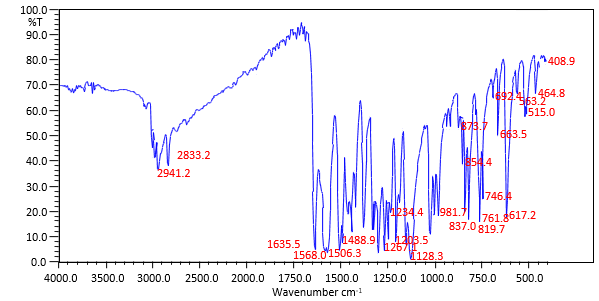


**F88**

**
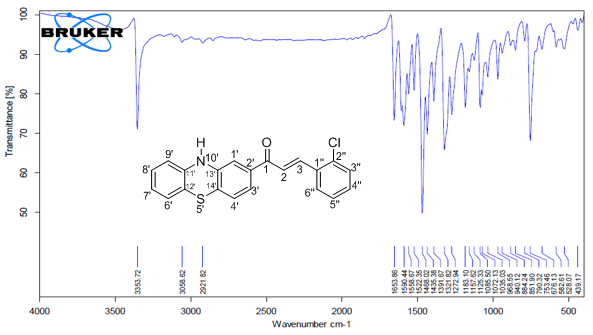
**

**F90**

**
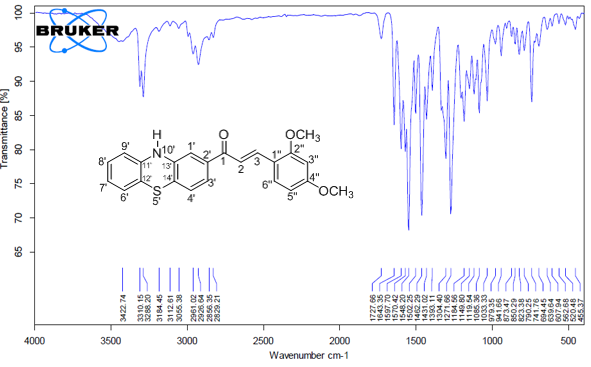
**

**F91**

**
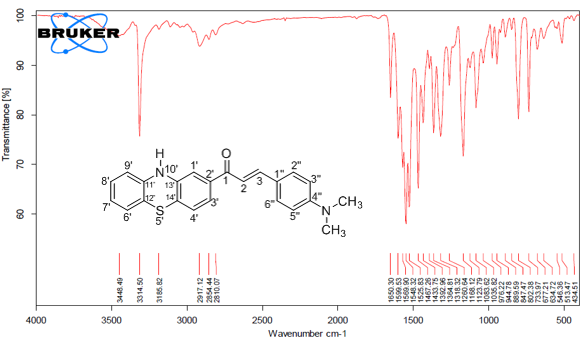
**

**Figure S2.** IR-spectra of the four selected chalcones F29, F88, F90 and F91.
